# Supplementary material for: The immunomodulatory molecule TIGIT is expressed by chronic lymphocytic leukemia cells and contributes to anergy
Source: PubMed Central journal article supplement — Haematologica. 2023 Jan 19;108(8):2101–15. doi: 10.3324/haematol.2022.282177 (PMC10388274; doi:10.3324/haematol.2022.282177), 2023-01-19
Supplement: 2022_282177_ARRUGA_SUPPL.pdf [file 2022_282177_ARRUGA_SUPPL.pdf]

# The immunomodulatory molecule TIGIT is expressed by chronic lymphocytic leukemia cells and contributes to anergy

Francesca Arruga,<sup>1</sup> Marta Rubin,<sup>1</sup> Despoina Papazoglou,<sup>2</sup> Andrea Iannello,<sup>1</sup> Nikolaos Ioannou,<sup>2</sup> Riccardo Moia,<sup>3</sup> Davide Rossi,<sup>4</sup> Gianluca Gaidano,<sup>3</sup> Marta Coscia,<sup>5</sup> Luca Laurenti,<sup>6</sup> Giovanni D'Arena,<sup>7</sup> John N. Allan,<sup>8</sup> Richard R. Furman,<sup>8</sup> Tiziana Vaisitti,<sup>1</sup> Alan G. Ramsay<sup>2</sup> and Silvia Deaglio<sup>1</sup>

<sup>1</sup>Laboratory of Functional Genomics, Department of Medical Sciences, University of Turin, Turin, Italy; <sup>2</sup>School of Cancer and Pharmaceutical Sciences, King's College London, London, UK; <sup>3</sup>Division of Hematology, Department of Translational Medicine, University of Eastern Piedmont, Novara, Italy; <sup>4</sup>Laboratory of Experimental Hematology, Institute of Oncology Research, Faculty of Biomedical Sciences, Università della Svizzera Italiana, Lugano, Switzerland; <sup>5</sup>Department of Molecular Biotechnology and Health Sciences, University of Turin and Division of Hematology, A.O.U. Città della Salute e della Scienza di Torino, Turin, Italy; <sup>6</sup>Hematology Unit, IRCCS Fondazione Policlinico Gemelli, Catholic University of "Sacred Heart", Rome, Italy; <sup>7</sup>Hematology, P.O. "S. Luca", ASL Salerno, Salerno, Italy and <sup>8</sup>Department of Hematology, Weill Cornell Medicine, New York, NY, USA.

**Correspondence:** S. Deaglio  
[silvia.deaglio@unito.it](mailto:silvia.deaglio@unito.it)

**Received:** October 10, 2022.

**Accepted:** January 11, 2023.

**Early view:** January 19, 2023.

<https://doi.org/10.3324/haematol.2022.282177>

©2023 Ferrata Storti Foundation

Published under a CC BY-NC license

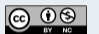

## Supplemental Material

### **The TIGIT/CD226/CD155 immunomodulatory axis is deregulated in CLL and contributes to B-cell anergy**

Francesca Arruga<sup>1</sup>, Marta Rubin<sup>1</sup>, Despoina Papazoglou<sup>2</sup>, Andrea Iannello<sup>1</sup>, Nikolaos Ioannou<sup>2</sup>, Riccardo Moia<sup>3</sup>, Davide Rossi<sup>4</sup>, Gianluca Gaidano<sup>3</sup>, Marta Coscia<sup>5</sup>, Luca Laurenti<sup>6</sup>, Giovanni D'Arena<sup>7</sup>, John N. Allan<sup>8</sup>, Richard R. Furman<sup>8</sup>, Tiziana Vaisitti<sup>1</sup>, Alan G. Ramsay<sup>2</sup> and Silvia Deaglio<sup>1</sup>

## Supplemental methods

### RNA extraction and qRT-PCR

RNA was extracted as described<sup>1</sup>. qRT-PCR was performed using the CFX384 instrument and analyzed with the CFX Maestro Software (Biorad). Primers for *TIGIT* (Hs00545087\_m1), *CD226* (Hs00170832\_m1), *CD155* (PVR, Hs00197846\_m1), *IL10* (Hs00961622\_m1) and *B2M* (Hs00984230\_m1) were all from ThermoFisher. The data were analyzed with the  $2^{-\Delta\Delta Ct}$  method, to calculate the relative expression of the gene under analysis. For each gene, expression levels were computed as the difference ( $\Delta Ct$ ) between the target gene CT and *B2M* CT. Values were normalized over those of Control RNA (Life Technologies, ThermoFisher) ( $\Delta\Delta Ct$ ), added in each experiment for calibration purposes, and expressed in linear or in logarithmic scale.

### Multispectral IHC, confocal microscopy and image analysis

IHC studies were performed on CLL LN tissues (Figure 1A n=6; Figure 5B, n= 3 UM-CLL; n=3 M-CLL) and reactive LN controls (Figure 1A n=4), as described<sup>2</sup>. The clinical characteristics of patients with mutated and unmutated IGHVs are presented in supplemental Table 1. Briefly, 4-5  $\mu\text{m}$  sections prepared from FFPE human tissues were deparaffinized prior to antigen retrieval in citrate buffer. After blocking (5% donkey serum), primary antibodies were incubated overnight at 4 °C. The primary antibodies used for this study are the following: goat anti-human CD20 (ab194970, Abcam), rat anti-human ki67 (ab156956, Abcam), rabbit anti-human TIGIT (A700-047, BETHYL), rabbit anti-human CD226 (A700-063, BETHYL). Following primary antibody incubation and washing steps (0.05% Triton PBS), secondary antibody (donkey) staining was performed for 1 h at room temperature. All secondary antibodies were obtained from Jackson ImmunoResearch: DyLight™ 405 AffiniPure Donkey anti-goat, Alexa Fluor® 488 AffiniPure Donkey anti-rabbit, Alexa Fluor® 647 AffiniPure Donkey anti-rat. The specificity of staining was optimized and controlled by using appropriate dilutions of primary or secondary staining alone. Slides were sealed with coverslips using mounting solution FluorSave™ reagent (Merck Millipore) and imaged within two days. Medial optical section images were captured with an A1R confocal microscope using a 20X objective with NIS-elements imaging software (Nikon). Detectors were set to detect an optimal signal below saturation limits. Fluorescence was acquired sequentially to prevent passage of

fluorescence from other channels (DU4 sequential acquisition). Image sets to be compared were acquired during the same session.

The percentage of LN CD20<sup>+</sup> CLL cells expressing TIGIT or CD226 in M or UM CLL cases was measured with the Imaris image analysis software v.9.7.2 (Bitplane). The surface tool was used to threshold the fluorescent signals and create two surfaces: i) CD20<sup>+</sup> cells (blue fluorescent channel) and ii) CD20<sup>+</sup>TIGIT<sup>+</sup> / CD20<sup>+</sup>CD226<sup>+</sup> (green fluorescent channel) double-positive cells (colocalization channel). For the B cell proliferation analysis (Ki67 expression), the area ( $\mu\text{m}^2$ ) of the colocalization signal of CD20<sup>+</sup>TIGIT<sup>+</sup> with Ki67 and CD20<sup>+</sup>CD226<sup>+</sup> with Ki67 was calculated. Three-five confocal images from representative areas were analyzed per patient tissue sample.

### **Phosflow assay**

Phosflow assay to evaluate BTK phosphorylation upon BCR stimulation was performed as described<sup>3</sup>. Briefly, CLL cells ( $10^6$ ) were thawed and plated over night to let them recover from anergy due to *in vivo* chronic BCR stimulation. After that,  $10^6$  cells were stimulated with 5  $\mu\text{g}/\text{ml}$  anti-IgM ( $\alpha\text{IgM}$ , Southern Biotech) for 5 minutes at 37 °C. Where indicated, cells were pre-treated (1 hour, on ice) with 5  $\mu\text{g}/\text{ml}$  rhTIGIT-Fc or with  $\alpha\text{TIGIT}$  or  $\alpha\text{CD226}$  blocking monoclonal antibodies (5  $\mu\text{g}/10^6$  cells, 30 minutes on ice), followed by 1 hour with rhCD155-Fc (5  $\mu\text{g}/\text{ml}$ ), before  $\alpha\text{IgM}$  stimulation.

### **CpG/IL-15 stimulation**

Stimulation of CLL cells proliferation with CpG/IL-15 was performed as described<sup>4</sup>. Briefly,  $5 \times 10^5$  CLL cells were cultured in a 96-well plate in RPMI 10% FCS and stimulated with 0.2  $\mu\text{M}$  CpG ODN2006 and 15ng/ml of IL-15 for 6 days (replenished every 2 days). After stimulation, cell were partly used for surface staining of TIGIT and CD226, performed as previously described, and partly fixed and permeabilized with ice-cold 70% ethanol to proceed with intracellular staining of Ki67, following manufacturer's instructions. Details for reagents used are listed in Supplemental table 4.

### **IL-10 production**

To assess IL-10 production, CLL cells were stimulated and stained as previously described<sup>5</sup>. Briefly, 10<sup>6</sup> cells were stimulated with phorbol 12-myristate 13-acetate (PMA, 50ng/ml) and ionomycin (1µg/ml) for 5 hours at 37 °C in the presence of a protein transport inhibitor cocktail (Invitrogen Ebioscience, Thermofisher) to prevent IL-10 secretion by CLL cells. Cells were washed and surface staining with anti-CD5 BB515 and anti-CD19 PECy7 (both from BD Biosciences) was performed. After that, cells were fixed and permeabilized using the BD Cytotfix/Cytoperm Fixation/Permeabilization kit (BD Biosciences) before staining with anti-IL10 APC (BD Biosciences).

## References

1. Vaisitti T, Gaudino F, Ouk S, et al. Targeting metabolism and survival in chronic lymphocytic leukemia and Richter syndrome cells by a novel NF-kappaB inhibitor. *Haematologica*. 2017;102(11):1878-1889.
2. Ioannou N, Hagner PR, Stokes M, et al. Triggering interferon signaling in T cells with avadomide sensitizes CLL to anti-PD-L1/PD-1 immunotherapy. *Blood*. 2021;137(2):216-231.
3. Arruga F, Bracciana V, Vitale N, et al. Bidirectional linkage between the B-cell receptor and NOTCH1 in chronic lymphocytic leukemia and in Richter's syndrome: therapeutic implications. *Leukemia*. 2020;34(2):462-477.
4. Mongini PK, Gupta R, Boyle E, et al. TLR-9 and IL-15 Synergy Promotes the In Vitro Clonal Expansion of Chronic Lymphocytic Leukemia B Cells. *J Immunol*. 2015;195(3):901-923.
5. Drennan S, D'Avola A, Gao Y, et al. IL-10 production by CLL cells is enhanced in the anergic IGHV mutated subset and associates with reduced DNA methylation of the IL10 locus. *Leukemia*. 2017;31(8):1686-1694.

**Supplemental Table1. CLL sample cohort.** AGE= age at diagnosis; WBC= white blood cells ( $\times 10^3/\mu\text{l}$ ); M=mutated; UM=unmutated; tri=trisomy; del=deletion.

| SAMPLE ID | SEX | AGE | WBC   | RAI | IGHV | FISH                | NOTCH1 mutations | CD5/CD19 (%) | CD38 <sup>+</sup> (%) | CD49d <sup>+</sup> (%) | Notes    |
|-----------|-----|-----|-------|-----|------|---------------------|------------------|--------------|-----------------------|------------------------|----------|
| CLL #1    | M   | 67  | 38,5  | I   | M    | tri12; del11; del17 | No               | 96,3         | 75,8                  | 90,7                   |          |
| CLL #2    | F   | 51  | 17,7  | I   | UM   | del13               | No               | 92,5         | 35,9                  | 34,9                   | TP53 mut |
| CLL #3    | M   | 61  | 63,3  | I   | M    | del13               | No               | 94,1         | 83,9                  | 37,6                   |          |
| CLL #4    | M   | 79  | 24    | 0   | M    | del13               | No               | 90,6         | 54,7                  | 49,7                   |          |
| CLL #5    | F   | 56  | 17,2  | 0   | M    | del13               | No               | 97,3         | 67,5                  | 64,7                   |          |
| CLL #6    | M   | 65  | 61,3  | II  | M    | del13               | No               | 95,2         | 57,7                  | 53,2                   |          |
| CLL #7    | M   |     | 4,7   | 0   | UM   | del11               | No               | 98,4         | 75                    | 48,4                   |          |
| CLL #8    | M   |     | 8,6   | I   | UM   | del13               | No               | 92           | 30,9                  | 43,2                   |          |
| CLL #9    | F   | 61  | 16,9  | 0   | UM   | tri12               | No               | 92,9         | 46,9                  | 50,4                   |          |
| CLL #10   | M   |     | 5,4   | I   | M    | tri12               | No               | 98,9         | 55,8                  | 76,4                   |          |
| CLL #11   | F   | 47  | 12,8  | 0   | M    | del13               | No               | 87,3         | 49,6                  | 42,7                   |          |
| CLL #12   | F   | 53  | 4,5   | 0   | UM   | tri12               | Yes              | 59,5         | 49                    | 59,4                   |          |
| CLL #13   | M   | 81  |       | II  | UM   | normal              | Yes              | 95,2         | 86,6                  | 53,3                   |          |
| CLL #14   | M   | 69  | 18,7  | II  | M    | del13               | No               | 92,8         | 53,4                  | 46,4                   |          |
| CLL #15   | F   | 65  | 480   | 0   | UM   | del13               | Yes              | 96,6         | 51,5                  | 79,5                   |          |
| CLL #16   | M   | 47  | 46,4  | II  | M    | del13               | No               | 92,8         | 48,4                  | 61,9                   |          |
| CLL #17   | M   | 53  | 30,1  | 0   | UM   | del13               | No               | 91,7         | 42,1                  | 61,4                   |          |
| CLL #18   | M   | 55  | 14,9  | 0   | UM   | del13               | No               | 96,1         | 62,6                  | 55,8                   |          |
| CLL #19   | F   |     | 7,4   | 0   | M    | del13               | No               | 74,7         | 41,5                  | 34,9                   |          |
| CLL #20   | M   |     | 182,7 | IV  | UM   | tri12; del17        | No               | 93,6         | 45,7                  | 68,6                   |          |
| CLL #21   | F   | 50  | 72,1  | IV  | M    | tri12               | No               | 92,8         | 91,9                  | 93,6                   |          |
| CLL #22   | F   | 63  | 32,7  | IV  | UM   | tri12               | Yes              | 90,4         | 36,8                  | 24,2                   |          |
| CLL #23   | M   | 49  | 56,5  | II  | UM   | tri12               | No               | 89,1         | 51,4                  | 92,7                   | TP53 mut |
| CLL #24   | M   | 47  | 121,4 | II  | UM   | tri12               | Yes              | 94,7         | 25,3                  | 50,4                   |          |
| CLL #25   | F   |     | 14,8  | I   | M    | del13               | No               | 94,5         | 31,9                  | 15,7                   |          |

| SAMPLE ID | SEX | AGE | WBC   | RAI | IGHV | FISH         | NOTCH1 mutations | CD5/CD19 (%) | CD38 <sup>+</sup> (%) | CD49d <sup>+</sup> (%) | Notes    |
|-----------|-----|-----|-------|-----|------|--------------|------------------|--------------|-----------------------|------------------------|----------|
| CLL #26   | F   | 65  | 43,4  | I   | M    | normal       | No               | 90,2         | 31,5                  | 26,9                   |          |
| CLL #27   | F   | 65  | 69    | II  | M    | normal       | No               | 94,7         | 27,7                  | 17,4                   |          |
| CLL #28   | M   | 67  | 16    | 0   | M    | del13        | No               | 86,4         | 24,6                  | 18                     |          |
| CLL #29   | M   | 79  | 14,8  | III | UM   | del11        | No               | 95,7         | 66,5                  | 29,4                   |          |
| CLL #30   | F   | 73  | 92    | III | UM   | tri12        | No               | 82,5         | 84,1                  | 97,6                   |          |
| CLL #31   | F   |     | 96,8  | II  | M    | del13        | No               | 88,8         | 37,3                  | 30,2                   |          |
| CLL #32   | M   | 35  | 23    | I   | M    | normal       | No               | 79,4         | 30,5                  | 14,3                   |          |
| CLL #33   | M   | 67  | 14,1  | II  | UM   | tri12        | Yes              | 92,1         | 82,7                  | 61,6                   |          |
| CLL #34   | M   | 78  | 22,1  | IV  | UM   | normal       | No               | 96,8         | 40,9                  | 54,2                   |          |
| CLL #35   | F   | 70  | 13    | 0   | UM   | normal       | No               | 93,3         | 32,5                  | 19,8                   |          |
| CLL #36   | M   |     | 8,7   | II  | UM   | del13        | No               | 69,7         | 73,7                  | 95,3                   |          |
| CLL #37   | M   | 54  |       | I   | M    | normal       | No               | 96           | 51,3                  | 87,8                   |          |
| CLL #38   | F   | 60  | 18    | 0   | UM   | normal       | No               | 82,4         | 37,5                  | 24,2                   |          |
| CLL #39   | M   |     | 13,3  | I   | UM   | normal       | No               | 91,4         | 9,1                   | 1,1                    |          |
| CLL #40   | M   | 35  |       | 0   | M    | normal       | No               | 93,2         | 41,6                  | 37,5                   |          |
| CLL #41   | M   | 62  | 58    | I   | M    | normal       | No               | 95,8         | 34,8                  | 26,7                   |          |
| CLL #42   | F   | 64  | 99,3  | 0   | UM   | del17        | Yes              | 91,4         | 36,6                  | 47,3                   |          |
| CLL #43   | M   | 50  | 23,1  | II  | M    | tri12        | No               | 81,9         | 29                    | 73,2                   |          |
| CLL #44   | M   | 72  | 21,1  | 0   | M    | del13        | No               | 72,7         | 20,4                  | 10,4                   |          |
| CLL #45   | M   |     | 128   | IV  | M    | del13        | No               | 93,5         | 26,7                  | 28,3                   | TP53 mut |
| CLL #46   | M   | 42  | 19,5  | I   | M    | del13        | No               | 84,4         | 18,3                  | 17,9                   |          |
| CLL #47   | M   | 59  | 33    | I   | M    | del17; del13 | No               | 99,6         | 59,4                  | 43,5                   |          |
| CLL #48   | M   | 51  | 175,1 | II  | M    | normal       | No               | 83,1         | 15,1                  | 10,4                   |          |
| CLL #49   | F   |     | 32    | I   | UM   | del13        | No               | 90,1         | 22,6                  | 31,3                   | TP53 mut |
| CLL #50   | M   | 64  | 31,1  | I   | UM   | del13        | No               | 84           | 19,5                  | 16                     |          |
| CLL #51   |     |     |       | II  | UM   | del13        | No               | 70,1         | 23,6                  | 18,2                   |          |
| CLL #52   | M   | 73  | 38,2  | 0   | M    | normal       | No               | 96,4         | 15                    | 10,8                   |          |

| SAMPLE ID | SEX | AGE | WBC  | RAI | IGHV | FISH   | NOTCH1 mutations | CD5/CD19 (%) | CD38 <sup>+</sup> (%) | CD49d <sup>+</sup> (%) | Notes    |
|-----------|-----|-----|------|-----|------|--------|------------------|--------------|-----------------------|------------------------|----------|
| CLL #53   | M   | 59  | 82,1 | I   | M    | del13  | No               | 87,5         | 19,3                  | 19,1                   |          |
| CLL #54   | F   | 58  | 2,3  | I   | UM   | del13  | No               | 82,7         | 32,6                  | 86,5                   | TP53 mut |
| CLL #55   | M   | 74  | 5,3  | I   | UM   | del13  | No               | 89,6         | 9,9                   | 8,63                   |          |
| CLL #56   | M   | 66  | 1,7  | I   | UM   | del13  | No               | 92,4         | 44,6                  | 14,7                   |          |
| CLL #57   | M   | 54  | 48,9 | I   | M    | del13  | No               | 90,5         | 22,6                  | 67,9                   | TP53 mut |
| CLL #58   | F   | 77  | 3,5  | 0   | M    | normal | Yes              | 86,3         | 42,7                  | 96,5                   |          |
| CLL #59   | F   | 80  | 1,5  | 0   | UM   | normal | Yes              | 96,1         | 3,2                   | 13,7                   |          |
| CLL #60   | M   | 66  |      | I   | M    | del13  | No               | 93,1         | 0,2                   | 8,21                   |          |
| CLL #61   | F   | 52  | 1    | I   | M    | del13  | No               | 84,5         | 0,1                   | 8,11                   |          |
| CLL #62   | M   | 71  | 2    | I   | UM   | del13  | No               | 83           | 26,6                  | 4,3                    |          |
| CLL #63   | F   | 63  | 1,6  | I   | M    | del13  | No               | 86,8         | 0,3                   | 5,7                    |          |
| CLL #64   | F   |     |      | 0   | M    | normal | No               | 67,7         | 2,3                   | 17,4                   |          |
| CLL #65   | M   | 82  | 3,2  | 0   | UM   | normal | No               | 76,8         | 2,5                   | 37,8                   |          |
| CLL #66   | F   | 65  | 38   | I   | M    | tri12  | Yes              | 92,2         | 0,2                   | 8,5                    |          |
| CLL #67   | M   | 63  | 80,2 | II  | M    | normal | No               | 96,2         | 0,1                   | 54,9                   |          |
| CLL #68   | M   | 53  | 15,7 | I   | M    | del13  | No               | 82,3         | 0,2                   | 55,9                   |          |
| CLL #69   | F   | 82  | 36,3 | I   | M    | del11  | No               | 95           | 0,1                   | 12                     |          |
| CLL #70   | F   | 74  |      | I   | M    | del13  | No               | 95,8         | 28,5                  | 29,6                   |          |
| CLL #71   | F   | 50  | 28,8 | I   | UM   | del13  | tbd              | 91,2         | 0,2                   | 28,6                   |          |
| CLL #72   | F   | 69  | 2,1  | I   | UM   | del13  | No               | 97,1         | 1                     | 58,6                   |          |
| CLL #73   | F   | 69  | 2,3  | I   | M    | del13  | No               | 81,8         | 16                    | 9,6                    |          |
| CLL #74   | M   | 62  | 1,1  | 0   | UM   | tri12  | No               | 91,1         | 8                     | 88,2                   |          |
| CLL #75   | M   | 55  | 3,3  | I   | M    | del13  | No               | 82,5         | 1                     | 28,7                   |          |
| CLL #76   | M   | 52  | 21   | 0   | UM   | del13  | No               | 98,3         | 78                    | 23,7                   |          |
| CLL #77   | F   | 54  | 1,7  | 0   | M    | del13  | No               | 80,5         | 17                    | 31,4                   |          |
| CLL #78   | M   | 59  | 1,9  | I   | M    | del13  | No               | 84,2         | 1                     | 20,5                   |          |
| CLL #79   | F   |     | 2    | 0   | UM   | del11  | No               | 95,6         | 10                    | 13,9                   |          |



| SAMPLE ID | SEX | AGE | WBC   | RAI | IGHV | FISH         | NOTCH1 mutations | CD5/CD19 (%) | CD38 <sup>+</sup> (%) | CD49d <sup>+</sup> (%) | Notes    |
|-----------|-----|-----|-------|-----|------|--------------|------------------|--------------|-----------------------|------------------------|----------|
| CLL #80   | M   | 49  | 1,8   | I   | M    | del13        | No               | 81,8         | 16                    | 11,6                   |          |
| CLL #81   | M   | 60  | 1,4   | 0   | M    | tri12        | No               | 35,7         | 88                    | 94,6                   |          |
| CLL #82   | M   | 61  | 61,7  | I   | M    | del13        | No               | 80,2         | 1,3                   | 16,9                   |          |
| CLL #83   | F   | 63  | 30,6  | 0   | UM   | normal       | No               | 90,5         | 4,3                   | 14,2                   |          |
| CLL #84   | M   | 48  | 35,7  | I   | UM   | del13        | No               | 45           | 86,9                  | 45,4                   |          |
| CLL #85   | F   | 42  | 40,1  | I   | UM   | del13        | No               | 90,4         | 79,3                  | 98,3                   |          |
| CLL #86   | M   | 54  | 43,5  | I   | M    | del13        | No               | 95,2         | 1,8                   | 16,7                   |          |
| CLL #87   | M   | 56  | 25,7  | 0   | M    | normal       | No               | 91,6         |                       | 15,6                   | TP53 mut |
| CLL #88   | M   | 63  | 76,8  | IV  | UM   | del13        | No               | 80,7         | 1                     | 99,3                   | TP53 mut |
| CLL #89   | M   | 75  | 260   | IV  | UM   | tri12        | No               | 55           | 1,1                   | 92,5                   |          |
| CLL #90   | F   | 64  | 221,9 | II  | UM   | del13        | No               | 98,2         | 76,9                  | 29,7                   |          |
| CLL #91   | F   | 57  | 107,1 | II  | M    | del13        | No               | 92,2         | 0,8                   | 0,1                    |          |
| CLL #92   | M   | 63  | 261   | IV  | UM   | del11; del17 | No               | 92,2         | 10,7                  | 63,7                   | TP53 mut |
| CLL #93   | F   | 73  | 255,9 | II  | UM   | normal       | Yes              | 76,4         | 37                    | 19                     |          |
| CLL #94   | F   | 47  | 41,7  | IV  | M    | del13        | No               | 94,5         | 1,5                   | 4,6                    |          |
| CLL #95   | F   | 68  | 168,6 | III | UM   | tri12        | ND               | 95,7         | 59,3                  | 93,1                   |          |
| CLL #96   | M   | 58  | 65,4  | II  | UM   | del13        | No               | 93,8         | 72,9                  | 70,8                   |          |
| CLL #97   | M   | 69  | 208   | III | UM   | del13        | No               | 92,3         | 1,5                   | 0,1                    |          |
| CLL #98   | M   | 57  | 115   | IV  | UM   | del13        | No               | 84,5         | 15,9                  | 21,2                   |          |
| CLL #99   | M   | 54  | 222,4 | III | UM   | del13        | Yes              | 95,5         | 85,3                  | 65,3                   |          |
| CLL #100  | M   | 58  | 178,7 | III | M    | del13; del11 | Yes              | 93,1         | 2,4                   | 0,1                    |          |
| CLL #101  | M   | 61  | 278,1 | IV  | UM   | del13; del11 | No               | 96,1         | 27,9                  | 4,6                    | TP53 mut |
| CLL #102  | M   | 35  | 80    | I   | UM   | normal       | No               | 95           | 40,5                  | 19,1                   |          |
| CLL #103  | M   | 65  |       | I   | UM   | normal       | No               | 90           | 43,9                  | 21,7                   |          |
| CLL #104  | M   | 75  |       | I   | UM   | normal       | Yes              | 90,7         | 75,8                  | 14,6                   |          |
| CLL #105  | F   | 70  | 32,7  | 0   | UM   | del13        | No               | 93,4         | 46,5                  | 20,3                   |          |
| CLL #106  | F   | 65  | 92,8  | I   | UM   | del13        | Yes              | 94,8         | 40,3                  | 26,8                   |          |

| <b>SAMPLE ID</b> | <b>SEX</b> | <b>AGE</b> | <b>WBC</b> | <b>RAI</b> | <b>IGHV</b> | <b>FISH</b> | <b>NOTCH1 mutations</b> | <b>CD5/CD19 (%)</b> | <b>CD38<sup>+</sup> (%)</b> | <b>CD49d<sup>+</sup> (%)</b> | <b>Notes</b>    |
|------------------|------------|------------|------------|------------|-------------|-------------|-------------------------|---------------------|-----------------------------|------------------------------|-----------------|
| <b>CLL #107</b>  | M          | 60         | 24,8       | I          | UM          | del11       | Yes                     | 88,2                | 43,9                        | 31,6                         |                 |
| <b>CLL #108</b>  | M          | 54         | 64,3       | I          | UM          | del13       | No                      | 99,1                | 40,3                        | 33,9                         |                 |
| <b>CLL #109</b>  | F          | 56         | 49,5       | 0          | UM          | tri12       | Yes                     | 93,9                | 56,2                        | 54,7                         |                 |
| <b>CLL #110</b>  | F          | 58         | 31,1       | 0          | UM          | del13       | No                      | 85,6                | 36,1                        | 9,9                          |                 |
| <b>CLL #111</b>  | F          | 73         | 46,4       | I          | UM          | tri12       | Yes                     | 72,7                | 70                          | 93,2                         |                 |
| <b>CLL #112</b>  | M          | 74         | 57,2       | IV         | UM          | del13       | Yes                     | 89,9                | 45                          | 31,9                         |                 |
| <b>CLL #113</b>  | M          | 68         | 80,5       | II         | UM          | del17       | No                      | 97,6                | 54,4                        | 91,7                         | <i>TP53 mut</i> |
| <b>CLL #114</b>  | M          |            | 36,8       | II         | UM          | del13       | No                      | 98,6                | 40                          | 39,2                         |                 |
| <b>CLL #115</b>  | F          | 74         | 31,6       | 0          | M           | del13       | No                      | 98,4                | 53,7                        | 33                           |                 |

**Supplemental Table2. Features of CLL samples examined during the follow up of the disease.** AGE= age at diagnosis; WBC= white blood cells ( $\times 10^3/\mu\text{l}$ ); M=mutated; UM=unmutated; tri=trisomy; del=deletion.

| SAMPLE ID | SEX | AGE | WBC  | RAI | IGHV | FISH         | NOTCH1 mutations | CD5/CD19 (%) | CD38 <sup>+</sup> (%) | CD49d <sup>+</sup> (%) | Notes    |
|-----------|-----|-----|------|-----|------|--------------|------------------|--------------|-----------------------|------------------------|----------|
| 04015     | M   | 46  | 11,4 | IV  | UM   | del17        | No               | 74,9         | 85,9                  | 66,4                   |          |
| 17698     | M   | 41  | 30   | IV  | ND   | del11; del13 | Yes              | 83,4         | 72,4                  | 80                     |          |
| 04025     | M   | 70  | 42   | III | UM   | del11        | No               | 91,6         | 37,2                  | 66,4                   | TP53 mut |
| 04028     | M   | 77  | 25   | IV  | ND   | del17        | No               | 93,9         | 44,4                  | 71                     | TP53 mut |
| 19275     | M   | 70  | 8,4  | I   | M    | normal       | No               | 81           | 84,4                  | 48,2                   |          |
| 4716      | F   | 61  | 265  | IV  | UM   | tri12        | No               | 92,7         | 67,2                  | 72,9                   |          |
| 04012     | F   | 71  | 3,11 | IV  | UM   | del17; del13 | Yes              | 60,3         | 67,7                  | 74,7                   | TP53 mut |
| 04013     | M   | 72  | 38   | II  | M    | del17; del13 | No               | 94,7         | 47,9                  | 49                     | TP53 mut |
| 6924      | M   | 47  | 22,9 | II  | UM   | del11; del13 | No               | 84,7         | 54,8                  | 44,5                   |          |
| 12752     | M   | 81  | 9,62 | I   | UM   | del13        | No               | 48           | 71,1                  | 23,8                   |          |
| 04002     | F   | 64  | 102  | I   | UM   | del17        | No               | 79,2         | 10,5                  | 4,55                   | TP53 mut |
| 22400     | M   | 58  | 95   | IV  | UM   | del11        | No               | 82,9         | 61,3                  | 48,9                   |          |
| 22742     | M   | 65  | 14,5 | II  | M    | del13        | No               | 96,1         | 45,9                  | 56,9                   |          |
| MA        | M   | 46  | 220  | II  | M    | normal       | No               | 97,2         | 42,2                  | 96,8                   |          |

**Supplemental Table 3.** Features of CLL patients used for histologic analyses on LN biopsies.

| <b>SAMPLE ID</b> | <b>SEX</b> | <b>AGE</b> | <b>RAI/BINET</b> | <b>IGHV</b> | <b>FISH</b> | <b>CD38<sup>+</sup> (%)</b> |
|------------------|------------|------------|------------------|-------------|-------------|-----------------------------|
| <b>CLL #1001</b> | M          | 76         | 0/A              | M           | Normal      | 85                          |
| <b>CLL #1002</b> | M          | 64         | 1/A              | M           | del (13q)   | 0                           |
| <b>CLL #1003</b> | M          | 50         | NK               | M           | NK          | NK                          |
| <b>CLL #1004</b> | M          | 76         | 2/B              | UM          | del (13q)   | 60                          |
| <b>CLL #1005</b> | F          | 75         | NK               | UM          | del (13q)   | NK                          |
| <b>CLL #1006</b> | F          | 80         | NK               | UM          | del (13q)   | NK                          |

\*NK=not known

**Supplemental Table 4.** List of antibodies and reagents.

| <b>Reagent</b>                                           | <b>Manufacturer</b>                                |
|----------------------------------------------------------|----------------------------------------------------|
| APC-R700 Mouse anti-Human CD5                            | BD Biosciences, Milan, Italy                       |
| BB515 Mouse anti-Human CD5                               | BD Biosciences, Milan, Italy                       |
| BV510 Mouse anti-Human CD19                              | BD Biosciences, Milan, Italy                       |
| PE-Cy7 Mouse anti-Human CD19                             | BD Biosciences, Milan, Italy                       |
| APC Mouse anti-Human CD73                                | BD Biosciences, Milan, Italy                       |
| BB515 Mouse anti-Human CD38                              | BD Biosciences, Milan, Italy                       |
| BV605 Mouse anti-Human CD49d                             | BD Biosciences, Milan, Italy                       |
| BV650 Mouse anti-Human CD3                               | BD Biosciences, Milan, Italy                       |
| APC-R700 Mouse anti-Human CD4                            | BD Biosciences, Milan, Italy                       |
| BV510 Mouse anti-Human CD8                               | BD Biosciences, Milan, Italy                       |
| APC-H7 Mouse anti-Human CD14                             | BD Biosciences, Milan, Italy                       |
| PE anti-human BTK (pTyr223)/ITK (pTyr180)                | BD Biosciences, Milan, Italy                       |
| APC Mouse anti-Human IL-10                               | BD Biosciences, Milan, Italy                       |
| PE Mouse anti-Human IgM                                  | BioLegend, San Diego, CA, USA                      |
| PE Mouse anti-Human TIGIT (Clone MBSA43)                 | Invitrogen Ebioscience, Thermofisher, Milan, Italy |
| PerCP-eFluor 710 Mouse anti-Human CD155 (Clone 2H7CD155) | Invitrogen Ebioscience, Thermofisher, Milan, Italy |
| PE-Vio770 Mouse anti-Human CD226 (DNAM1) (Clone DX11)    | Miltenyi Biotec, Bologna, Italy                    |
| APC Anti-Human and -Mouse Ki-67                          | Miltenyi Biotec, Bologna, Italy                    |
| Recombinant Human TIGIT Fc Chimera Protein               | R&D System, Bio-Techne SRL, Milan,Italy            |
| Recombinant Human CD155/PVR Fc Chimera Protein           | R&D System, Bio-Techne SRL, Milan,Italy            |
| TIGIT Monoclonal Antibody (MBSA43), Functional Grade     | Invitrogen Ebioscience, Thermofisher, Milan, Italy |
| CD226 (DNAM-1) Monoclonal Antibody (DX11)                | Invitrogen Ebioscience, Thermofisher, Milan, Italy |
| Goat Anti-Human IgM-unlabeled                            | Southern Biotech, Birmingham, AL, USA              |
| CpG ODN 2006                                             | InvivoGen, Toulouse, France                        |
| Recombinant Human IL-15 Protein                          | R&D System, Bio-Techne SRL, Milan,Italy            |

**Supplemental Table 5.** Flow cytometry multiparametric strategy. FMO= Fluorescence Minus One.

| <b>Mix ID</b>             | <b>Marker</b> | <b>Fluorochrome</b> |
|---------------------------|---------------|---------------------|
| <b>FMO B_1</b>            | CD5           | APC-R-700           |
|                           | CD19          | BV510               |
|                           | IgM           | PE                  |
|                           |               |                     |
| <b>FMO B_2</b>            | CD5           | APC-R-700           |
|                           | CD19          | BV510               |
|                           | CD73          | APC                 |
|                           | CD38          | BB515               |
|                           | CD49d         | BV605               |
|                           |               |                     |
| <b>TIGIT panel B</b>      | CD5           | APC-R-700           |
|                           | CD19          | BV510               |
|                           | CD73          | APC                 |
|                           | CD38          | BB515               |
|                           | CD49d         | BV605               |
|                           | TIGIT         | PE                  |
|                           | CD155         | PerCP-Cy5.5         |
|                           | CD226         | PE-Cy7              |
|                           |               |                     |
| <b>FMO T/Mono</b>         | CD3           | BV650               |
|                           | CD4           | APC-R-700           |
|                           | CD8           | BV510               |
|                           | CD14          | APC-H7              |
|                           |               |                     |
| <b>TIGIT panel T/Mono</b> | CD3           | BV650               |
|                           | CD4           | APC-R-700           |
|                           | CD8           | BV510               |
|                           | CD14          | APC-H7              |
|                           | TIGIT         | PE                  |
|                           | CD155         | PerCP-Cy5.5         |
|                           | CD226         | PE-Cy7              |

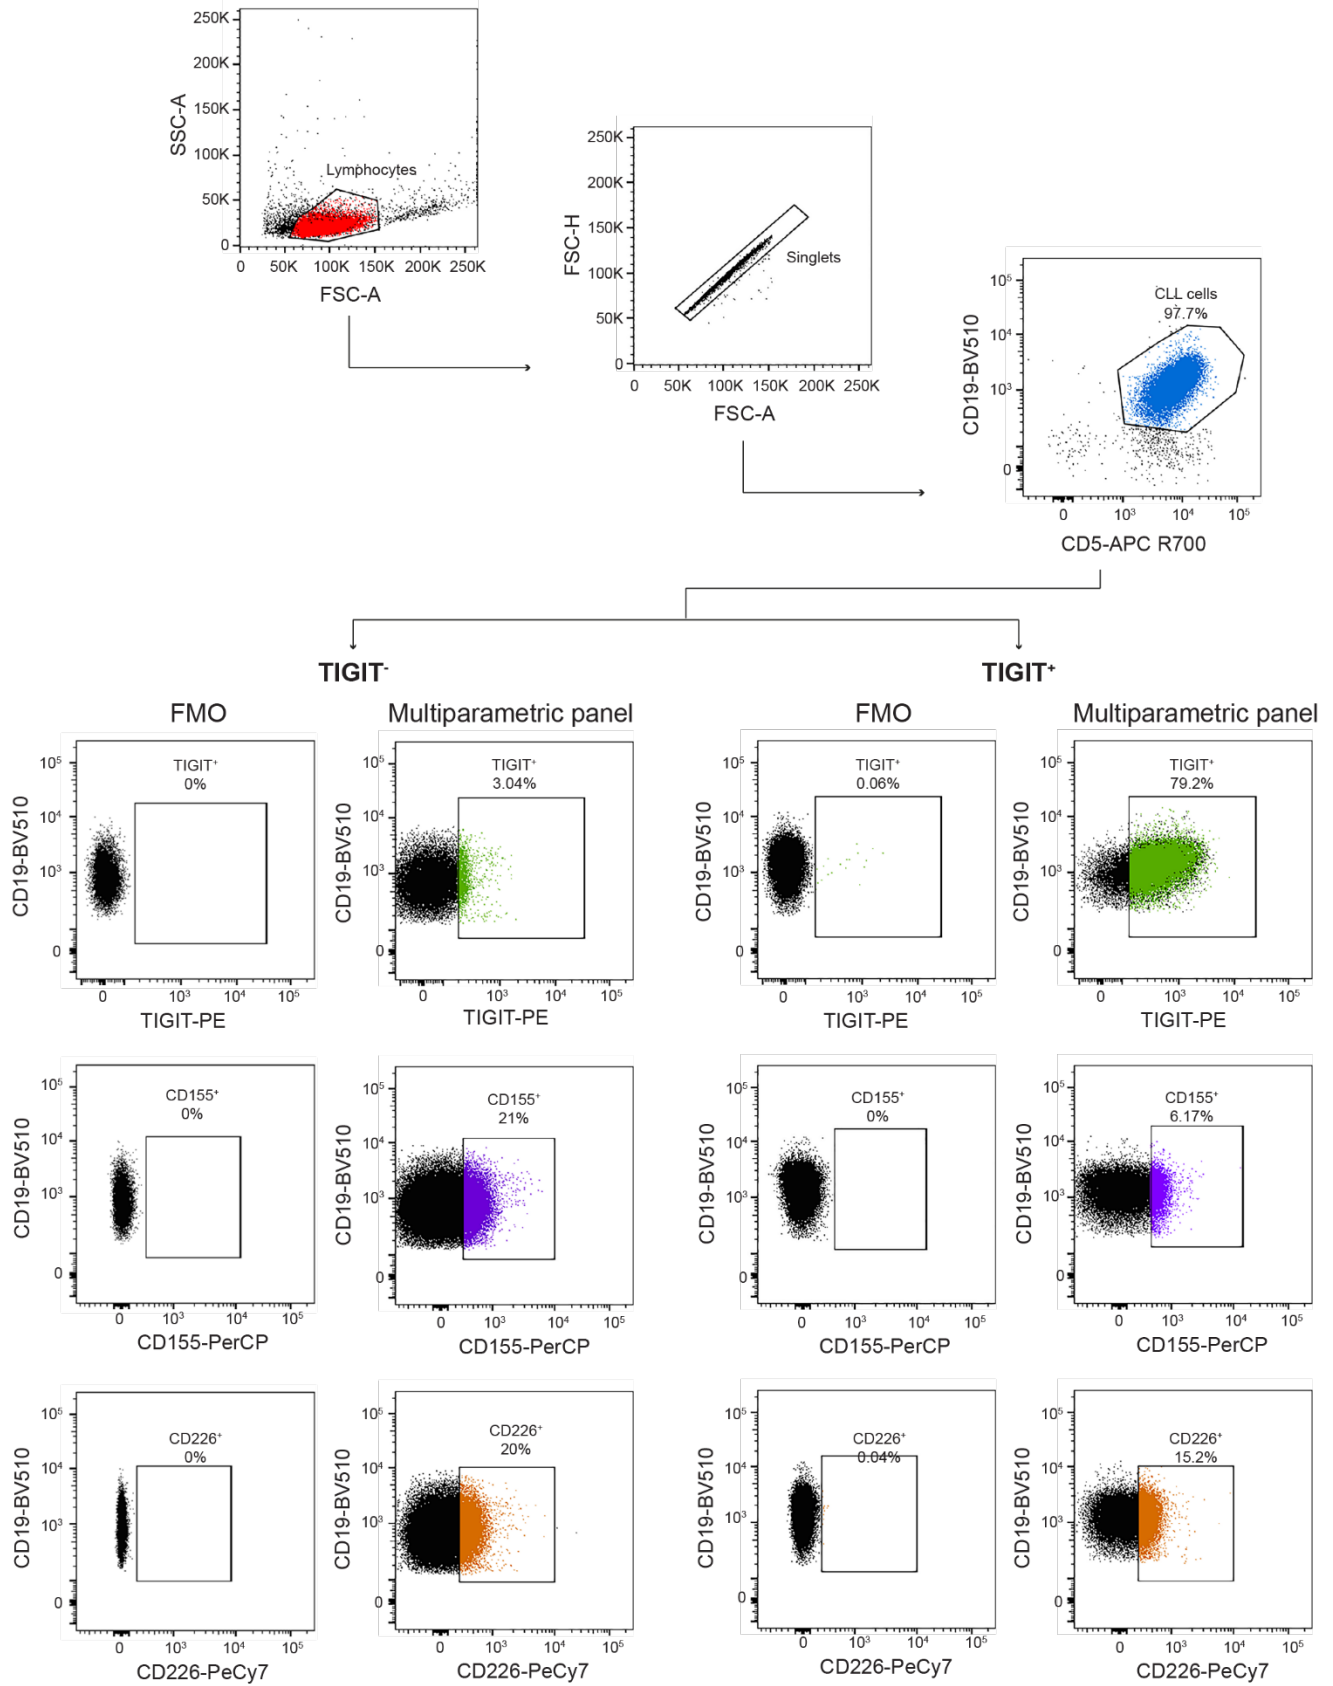

**Supplemental Figure 1. Flow cytometry gating strategy for B cells.** Lymphocytes were morphologically gated and singlets were examined. B cells were isolated as CD19<sup>+</sup>/CD5<sup>+</sup> cells (CLL cells) or CD19<sup>+</sup> cells (normal B lymphocytes). The gates for TIGIT<sup>+</sup>, CD226<sup>+</sup> and CD155<sup>+</sup> cells were set based on the Fluorescence Minus One (FMO) to take into account the presence of multiple fluorochromes.



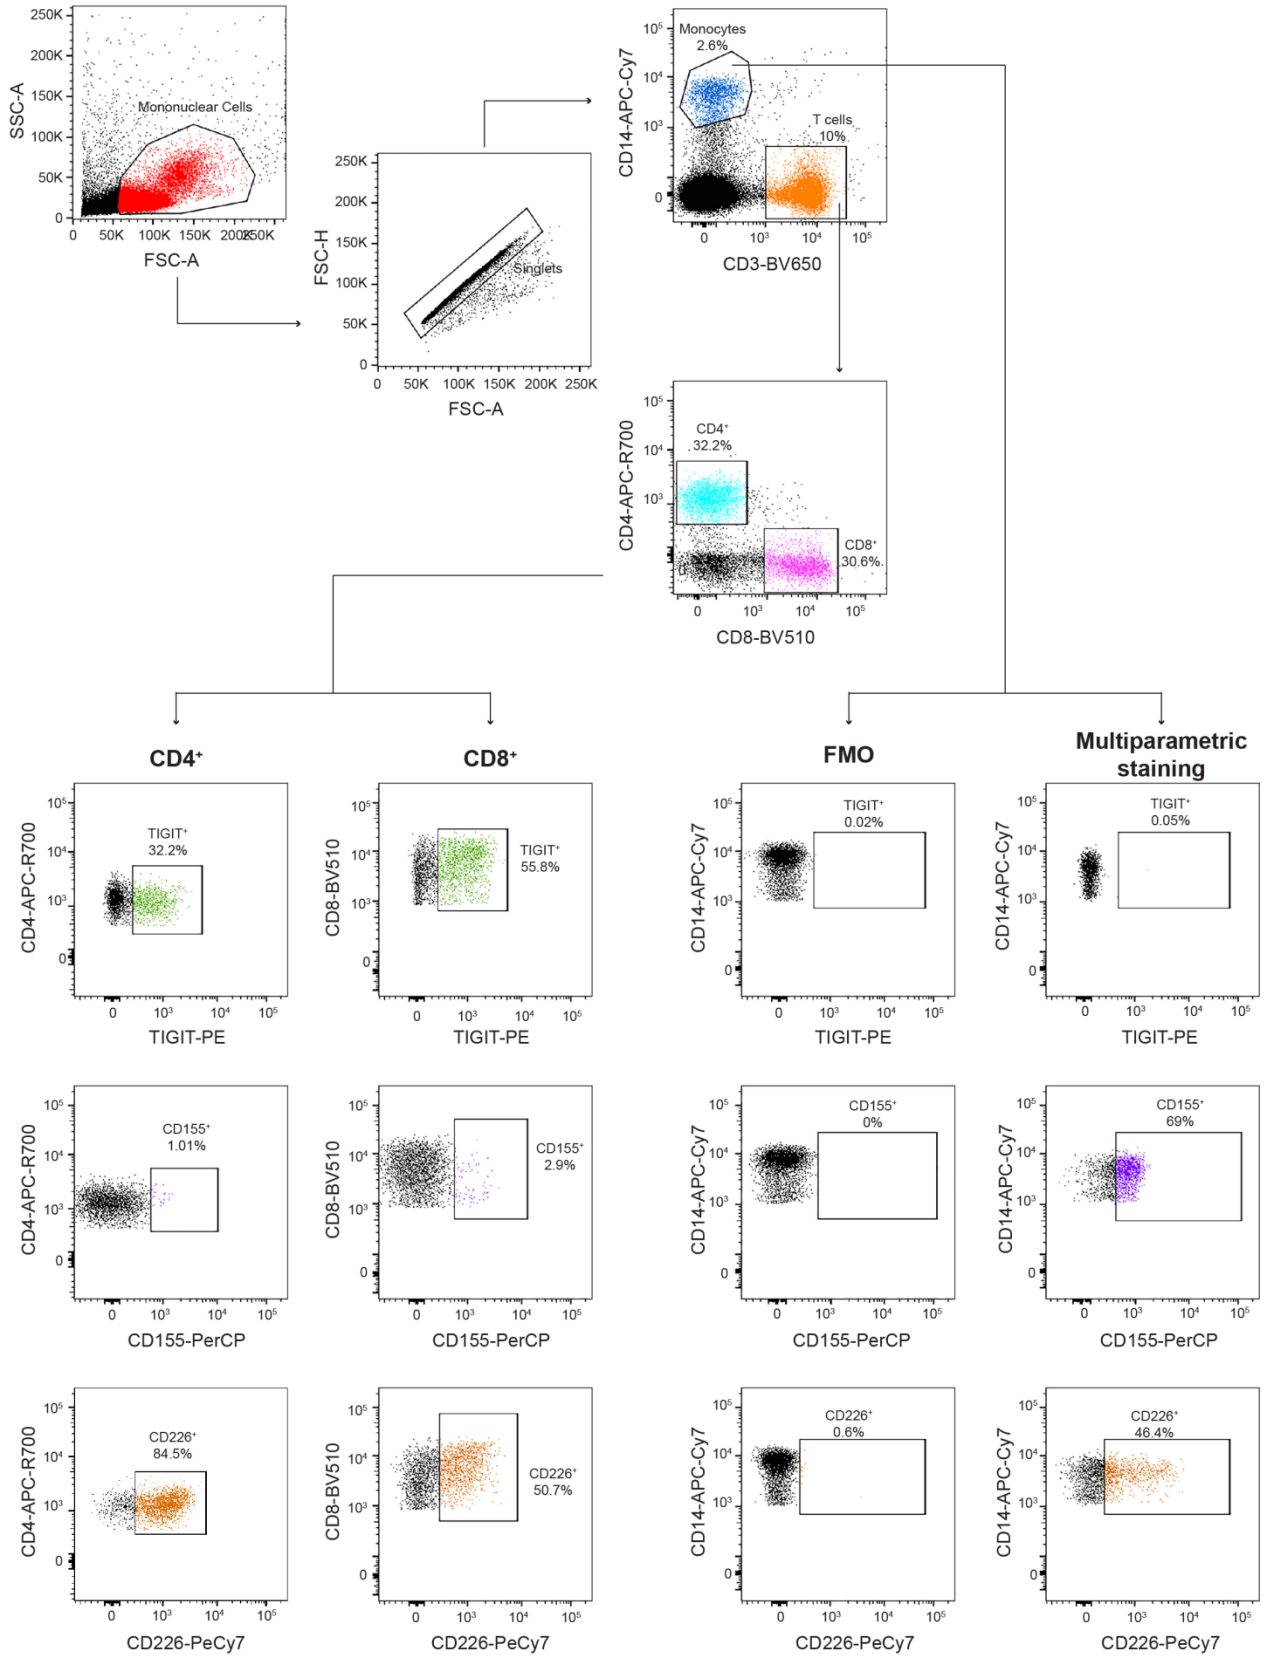

Supplemental Figure 2

**Supplemental Figure 2. Flow cytometry gating strategy for T cells and monocytes.** Mononuclear cells were morphologically gated and singlets were examined. T cells were defined as CD3<sup>+</sup> cells and further divided in CD4<sup>+</sup> and CD8<sup>+</sup> T lymphocytes, monocytes were defined as CD14<sup>+</sup> cells. For each subpopulation, gates for TIGIT<sup>+</sup>, CD226<sup>+</sup> and CD155<sup>+</sup> cells were set based on the FMO (not shown for CD4<sup>+</sup> and CD8<sup>+</sup>).

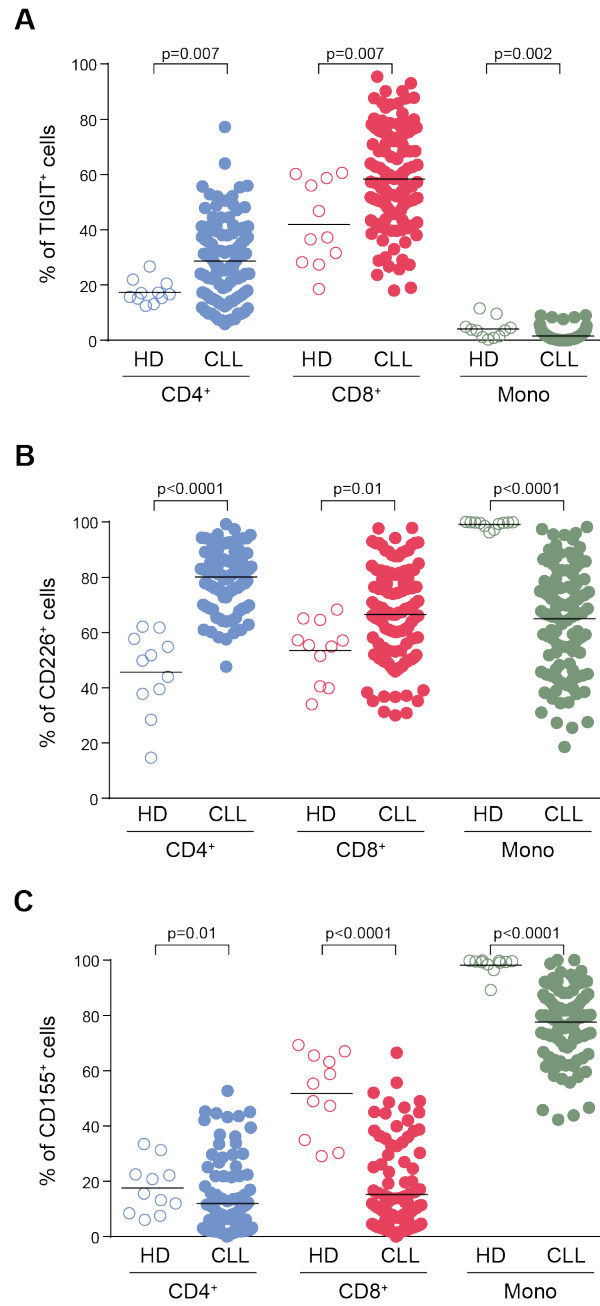

Supplemental Figure 3

**Supplemental Figure 3. Expression of TIGIT, CD226 and CD155 on PBMC subpopulations.** Flow cytometry analysis of TIGIT, CD226 and CD155 expression on CD4+ or CD8+ T lymphocytes and monocytes collected from CLL patients and healthy donors (HD).

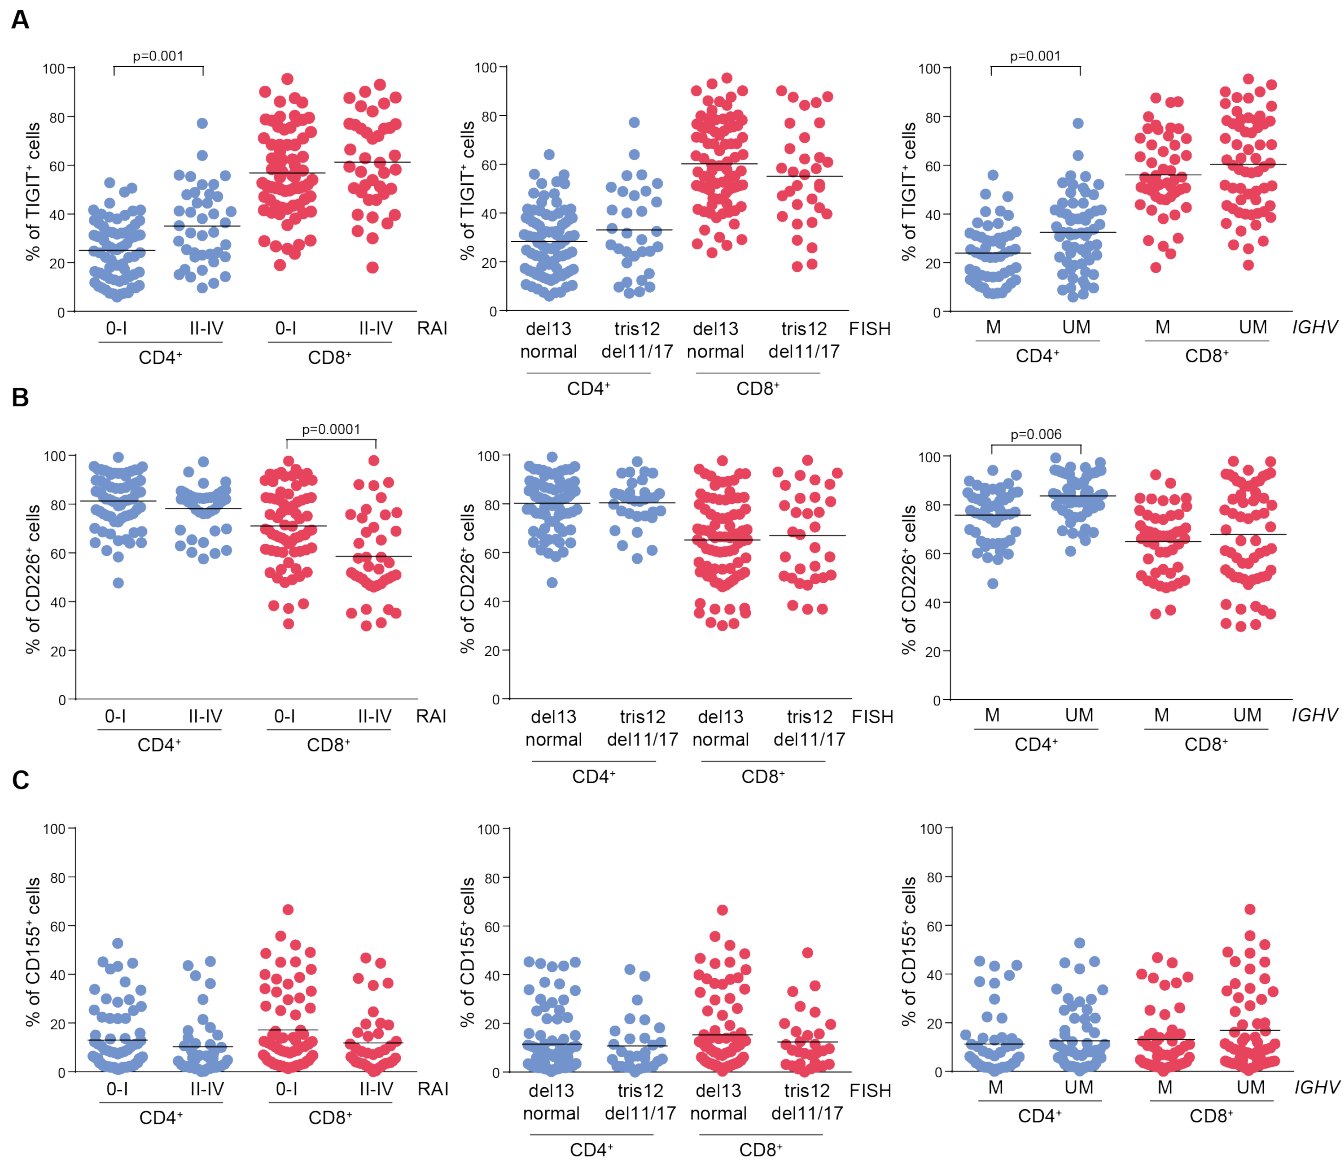

Supplemental Figure 4

**Supplemental Figure 4. TIGIT axis in T lymphocytes from CLL patients.** **A.** Flow cytometry analysis of surface TIGIT in CD4<sup>+</sup> and CD8<sup>+</sup> cells collected from CLL samples, divided according to prognostic markers (left: RAI; middle: cytogenetics; right: *IGHV* mutation). **B.** Flow cytometry analysis of surface CD226 in CD4<sup>+</sup> and CD8<sup>+</sup> cells collected from CLL samples, divided according to prognostic markers (left: RAI; middle: cytogenetics; right: *IGHV* mutation). **C.** Flow cytometry analysis of surface CD155 in CD4<sup>+</sup> and CD8<sup>+</sup> cells collected from CLL samples, divided according to prognostic markers (left: RAI; middle: cytogenetics; right: *IGHV* mutation).

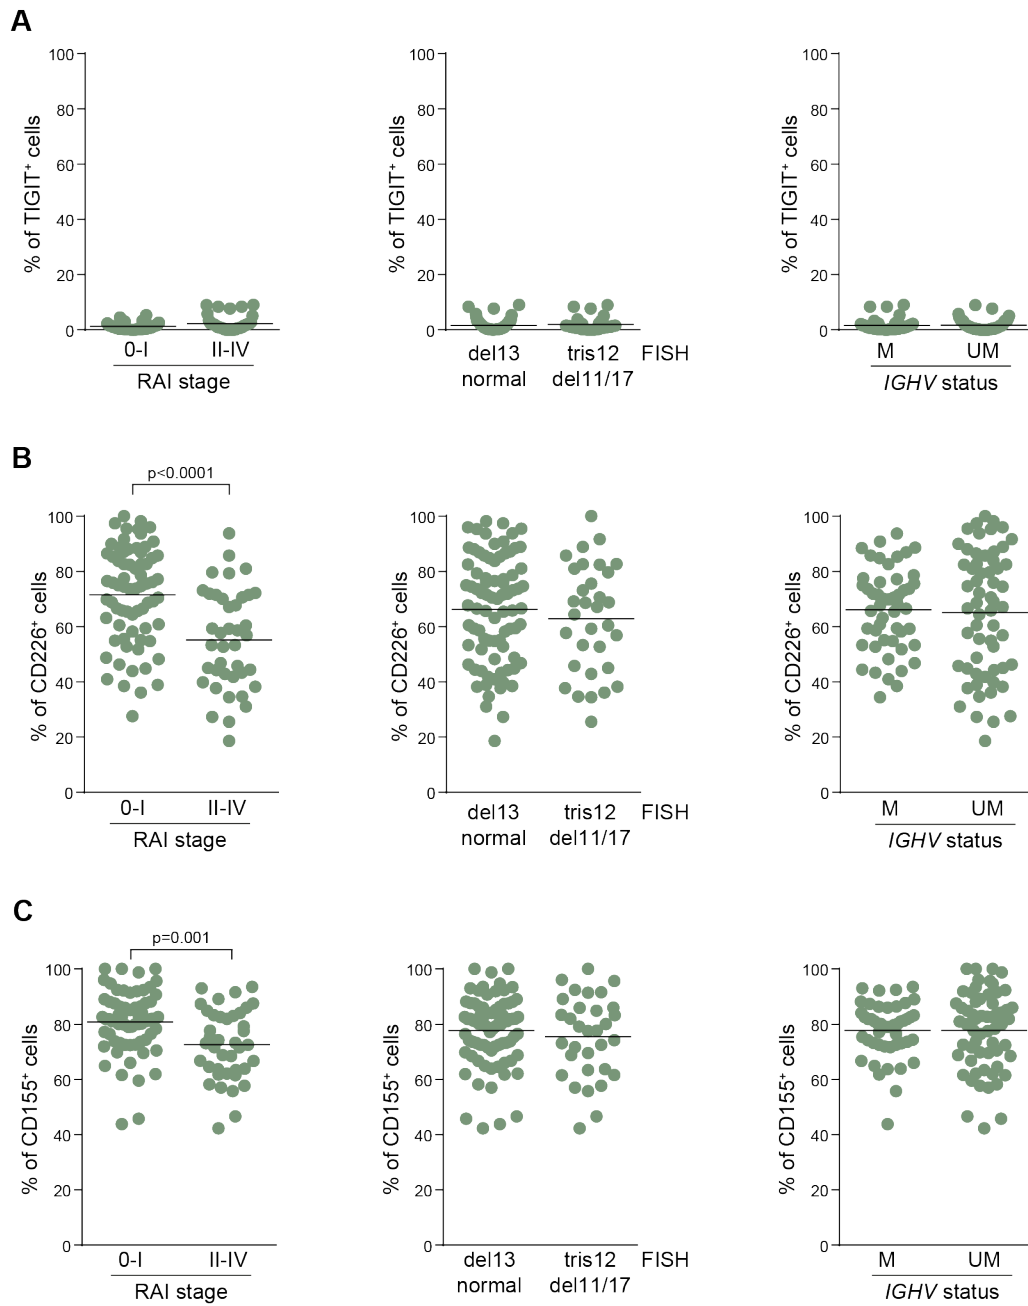

Supplemental Figure 5

**Supplemental Figure 5. TIGIT axis in monocytes from CLL patients.** **A.** Flow cytometry analysis of surface TIGIT in monocytes collected from CLL samples, divided according to prognostic markers (left: RAI; middle: cytogenetics; right: *IGHV* mutation). **B.** Flow cytometry analysis of surface CD226 in monocytes collected from CLL samples, divided according to prognostic markers (left: RAI; middle: cytogenetics; right: *IGHV* mutation). **C.** Flow cytometry analysis of surface CD155 in monocytes collected from CLL samples, divided according to prognostic markers (left: RAI; middle: cytogenetics; right: *IGHV* mutation).



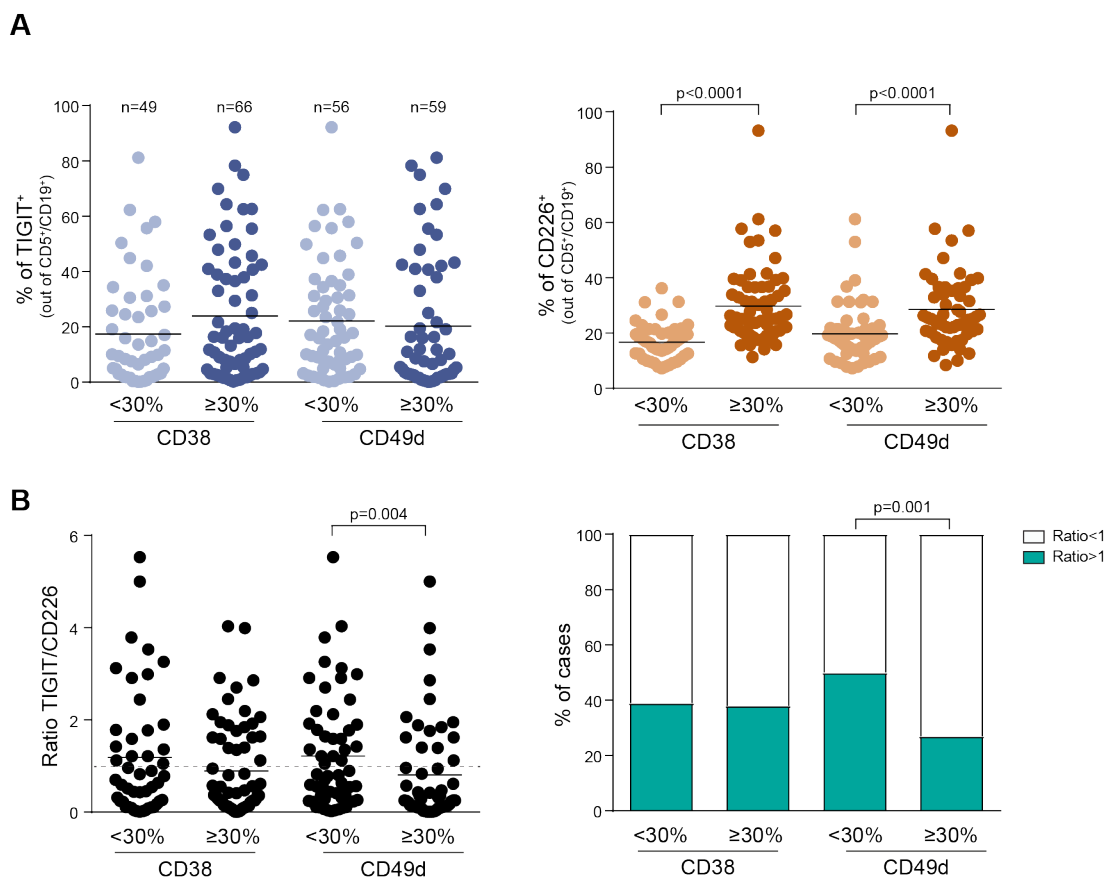

Supplemental Figure 6

**Supplemental Figure 6. TIGIT and CD226 expression according to CD38 and CD49d.** **A.** Percentages of TIGIT<sup>+</sup> and CD226<sup>+</sup> cells in CD38<sup>+</sup>/CD38<sup>-</sup> and CD49d<sup>+</sup>/CD49d<sup>-</sup> CLL samples (top panels); **B.** Dot plot showing TIGIT:CD226 ratio values for all the CLL samples divided according to the expression of CD38 and CD49d (left) and contingency plot indicating the enrichment of samples with ratio ≥1 or <1 in either prognostic category (right). Dashed line at Y=1 indicates the threshold to discriminate between negative signaling (TIGIT:CD226 ratio>1, prevalence of TIGIT) and positive signaling (TIGIT:CD226 ratio<1, prevalence of CD226).

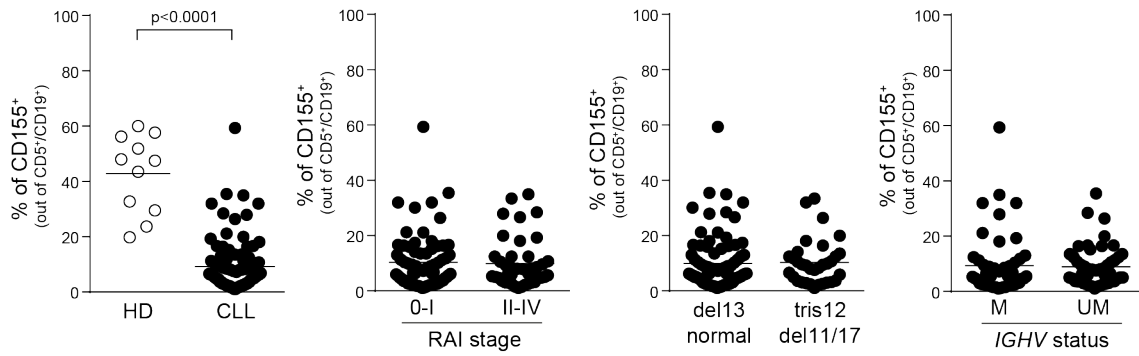

Supplemental Figure 7

**Supplemental Figure 7. Expression of CD155.** Flow cytometry analysis of surface CD155 expression in CLL samples compared to HD and correlation with CLL prognostic markers.

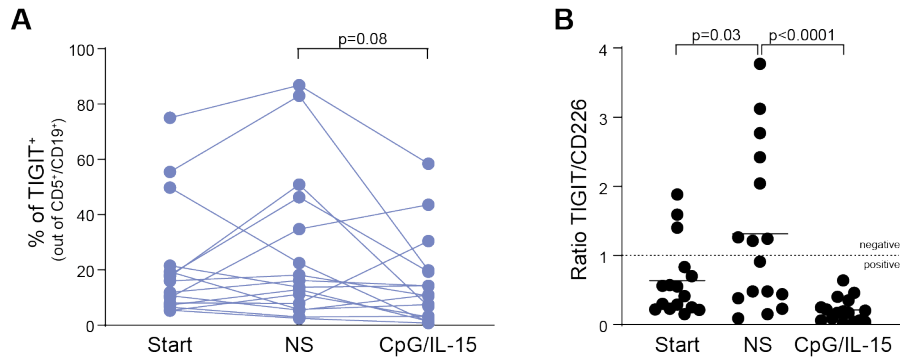

Supplemental Figure 8

**Supplemental Figure 8. Modulation of TIGIT axis upon CpG/IL-15 culture.** **A.** Flow cytometry analysis of TIGIT expression at the starting point and after 6 days of culture in the presence or absence of CpG/IL-15. **B.** Analysis of TIGIT:CD226 ratio at the starting point and after 6 days of culture in the presence or absence of CpG/IL-15. Dashed line at Y=1 indicates the threshold to discriminate between negative signaling (TIGIT:CD226 ratio>1, prevalence of TIGIT) and positive signaling (TIGIT:CD226 ratio<1, prevalence of CD226).

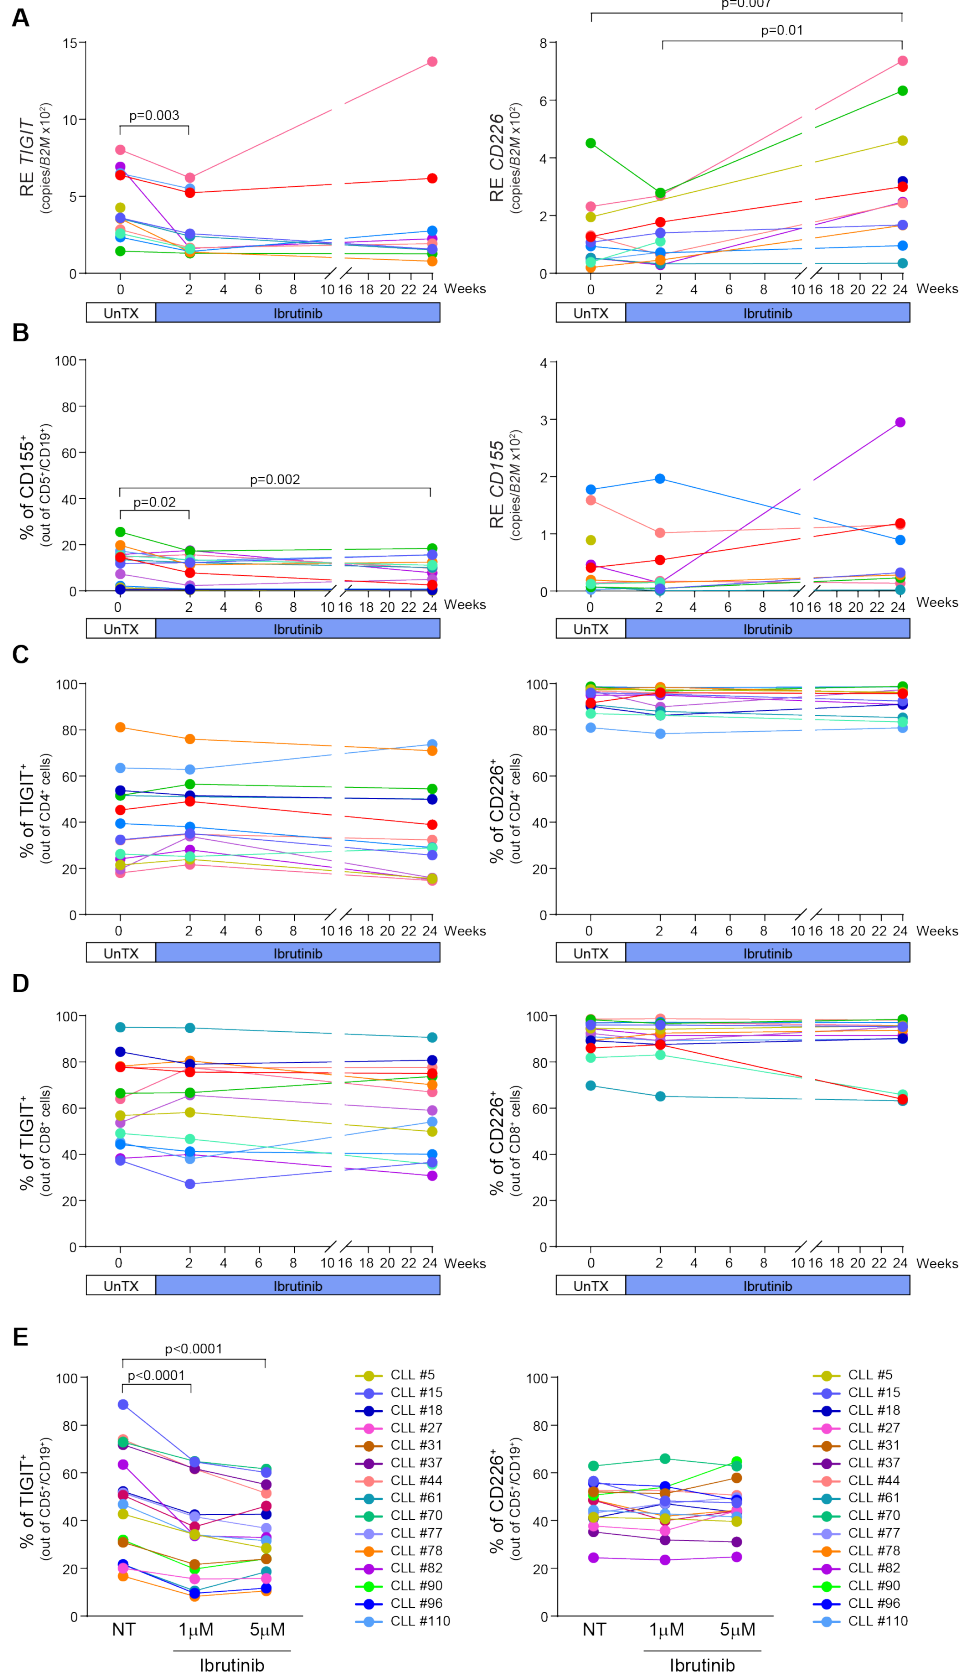

**Supplemental Figure 9. TIGIT, CD226 and CD155 during the follow up.** **A.** qRT-PCR analysis of *TIGIT* and *CD226* expression in CLL samples collected before treatment initiation or after 2 weeks or 24 weeks of ibrutinib therapy. **B.** Flow cytometry (left) and qRT-PCR analysis (right) of CD155 expression in CLL samples collected before treatment initiation or after 2 weeks or 24 weeks of ibrutinib therapy. **C.** Flow cytometry analysis of TIGIT (left) and CD226 (right) on CD4<sup>+</sup> T cells collected from CLL samples during the follow up. **D.** Flow cytometry analysis of TIGIT (left) and CD226 (right) on CD8<sup>+</sup> T cells collected from CLL samples during the follow up. **E.** Flow cytometry analysis of the percentage of TIGIT<sup>+</sup> (left) and CD226<sup>+</sup> (right) leukemic cells in CLL samples treated *in vitro* with 1 ad 5  $\mu$ M ibrutinib for 48 hours.

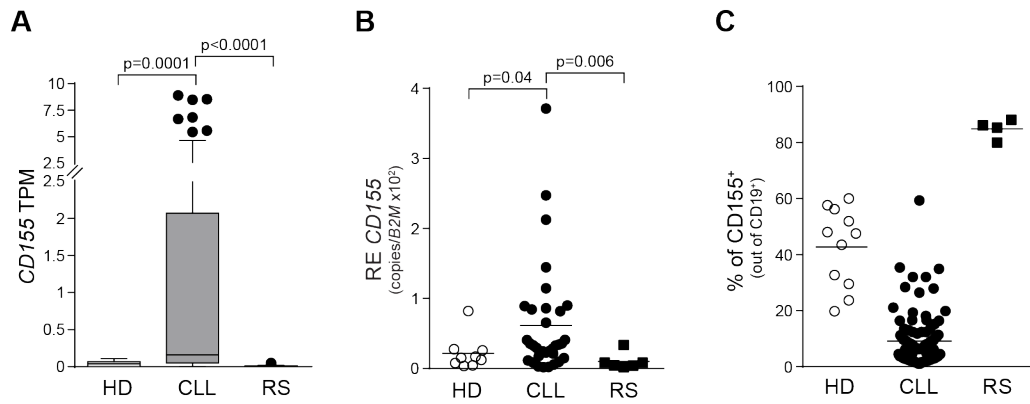

Supplemental Figure 10

**Supplemental Figure 10. CD155 expression in RS. A.** *CD155* TPM values in HD, CLL and primary RS samples. **B.** qRT-PCR validation of *CD155* expression in HD and CLL samples and in RS-PDX. **C.** Flow cytometry analysis of surface CD155 in HD and CLL samples and in RS-PDX.
